# Supplementary material for: Immune modulation attenuates infantile neuronal ceroid lipofuscinosis in mice before and after disease onset
Source: PubMed Central journal article supplement (PMC8098642; doi:10.1093/braincomms/fcab047), 2021-03-21
Supplement: fcab047_supplementary_data.pdf [file fcab047_supplementary_data.pdf]

**A**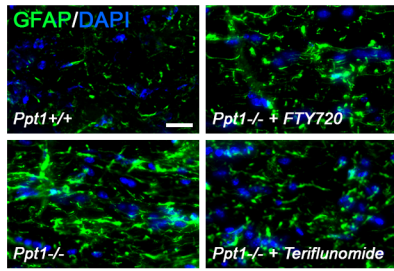**GFAP+ astrocytes**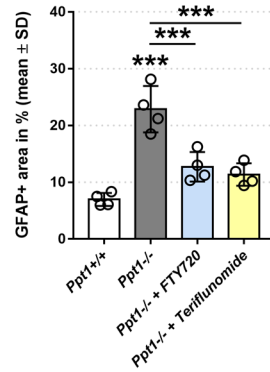**B****Cerebellar brain weight**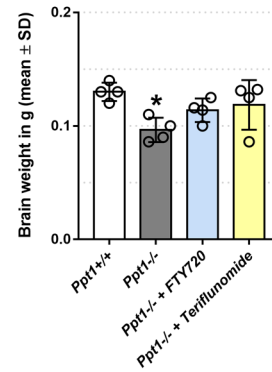

**Supplementary Figure 1 Therapeutic treatment with fingolimod and teriflunomide reduces astrogliosis and leads to a trend towards mitigated cerebellar atrophy.** (A) Representative immune fluorescence microscopy and quantification of GFAP+ astrocytes in optic nerves and (B) cerebellar brain weights of 7-month-old *Ppt1*<sup>+/+</sup>, *Ppt1*<sup>-/-</sup>, fingolimod-treated *Ppt1*<sup>-/-</sup> (+ FTY720) and teriflunomide-treated *Ppt1*<sup>-/-</sup> (+ Teriflunomide) mice ( $n = 4$  mice per group, One-way ANOVA and Tukey's *post hoc* test). \* $P < 0.05$ , \*\*\* $P < 0.001$ .
